# Supplementary material
Source: Frontiers journal article supplement (https://www.frontiersin.org/articles/325125)
Supplement: Data_Sheet_1.xlsx [file Data_Sheet_1.xlsx]

## Sheet: complete_and_partial_ID_lignin
Supplementary Table S3
Complete Identifications
3-O-caffeoyl-quinate
4-O-caffeoyl-quinate
5-hydroxyferulic acid
5-hydroxyferulic acid-glucoside
5-O-caffeoyl-quinate
benzyl-coumaroyl-glucoside
caffeic acid
cis-3-O-caffeoyl-quinate
cis-cinnamic acid
cis-p-coumaric acid
coniferin
coniferyl alcohol
coumaric acid-4-O-glucoside
coumaroyl-tremuloidin
ferulic acid
guaiacylglycerol
p-hydroxybenzoic acid
phenylalanine
quinic acid
salicyl-coumaroyl-glucoside
salicyloyl-coumaroyl-glucoside
secoisolariciresinol
shikimic acid
syringaresinol
syringin
syringin
trans-cinnamic acid
trans-p-coumaric acid
vanillic acid-4-O-glucoside
Partial Identifications
RT	mz	ID
13.26	249	13.26 249 feruloyl glycoside
15.62	279	15.62 279 297 217 guaiacyl lignan glycoside
15.6	297	15.60 297 279 217 guaiacyl lignan glycoside
15.71	267	15.71 267 204 hydroxyphenyl lignan glycoside
15.98	297	15.98 297 361 209 guaiacyl lignan glycoside
16.02	350	16.02 350 361 219 glycoside
16.05	219	16.05 219 coumaroyl conjugate
16.08	297	16.08 297 583 361 glycoside
16.12	297	16.12 297 225 guaiacyl lignan
16.16	327	16.16 327 307 syringyl lignan
16.2	219	16.20 219 468 453 coumaroyl conjugate
16.27	105	16.27 105 396 179 benzoyl-salicylate caffeic acid conjugate
16.3	297	16.30 297 204 583 glycoside
16.5	297	16.50 297 guaiacyl lignan
16.51	327	16.51 327 syringyl lignan
16.54	327	16.54 327 297 369 syringyl-guaiacyl lignan
16.61	219	16.61 219 283 204 glycoside
16.69	297	16.69 297 354 171 209 phenolic
17.14	297	17.14 297 282 phenolic
17.43	91	17.43 91 476 benzyl conjugate
17.44	171	17.44 171 219 331 coumaroyl conjugate
17.5	171	17.50 171 219 331 coumaroyl conjugate
17.65	538	17.65 538 644 452 320 293 219
17.69	219	17.69 219 204 coumaroyl glycoside
17.96	171	17.96 171 381 219 204 coumaroyl caffeoyl glycoside
18.04	171	18.04 171 381 219 204 coumaroyl caffeoyl glycoside
18.07	255	18.07 255 219 171 119 coumaroyl conjugate
18.2	219	18.20 219 307 caffeoyl conjugate
18.32	219	18.32 219 331 171 coumaroyl conjugate
18.53	219	18.53 219 331 171 coumaroyl conjugate
19.1	171	19.10 171 381 219 caffeoyl conjugate
19.16	219	19.16 219 307 caffeoyl conjugate
20.17	171	20.17 171 204 307 469 caffeoyl-quercetin glycoside
20.26	171	20.26 171 469 204 307 caffeoyl-quercetin-glycoside
